1 **Title Page**

2 **MGenrichment: a web application for microglia gene list enrichment analysis**

3

4 Justin Jao and Annie Vogel Ciernia\*

5

6 Biochemistry and Molecular Biology

7 Djavad Mowafaghian Centre for Brain Health

8 University of British Columbia, Vancouver Canada

9 2215 Wesbrook Mall

10 Vancouver, BC V6T2A1

11 Canada

12

13

14 \*Corresponding author.

15 [annie.ciernia@ubc.ca](mailto:annie.ciernia@ubc.ca)

16

17

18

19

20

21

22

23

24 **Abstract**

25 Gene expression analysis is becoming increasingly utilized in neuro-immunology research, and there  
26 is a growing need for non-programming scientists to be able to analyze their own genomic data.

27 MGENrichment is a web application developed both to disseminate to the community our curated  
28 database of microglia-relevant gene lists, and to allow non-programming scientists to easily conduct  
29 statistical enrichment analysis on their gene expression data. Users can upload their own gene IDs to  
30 assess the relevance of their expression data against gene lists from other studies. We include  
31 example datasets of differentially expressed genes (DEGs) from human postmortem brain samples  
32 from Autism Spectrum Disorder (ASD) and matched controls. We demonstrate how MGENrichment  
33 can be used to expand the interpretations of these DEG lists in terms of regulation of microglial gene  
34 expression and provide novel insights into how ASD DEGs may be implicated specifically in  
35 microglial development, microbiome responses and relationships to other neuropsychiatric disorders.  
36 This tool will be particularly useful for those working in microglia, autism spectrum disorders, and  
37 neuro-immune activation research. MGENrichment is available at  
38 <https://ciernialab.shinyapps.io/MGENrichmentApp/> and further online documentation and datasets  
39 can be found at <https://github.com/ciernialab/MGENrichmentApp>. The app is released under the  
40 GNU GPLv3 open source license.

41

42

43

44

45

46

47

## 48 **Introduction**

49 With the recent advances in sequencing technology, researchers are increasingly able to generate  
50 larger amounts of genomic data. Investigating changes in gene expression has allowed  
51 neuroscientists to move beyond the high-level analysis of cellular dynamics, and into the  
52 investigation of the molecular and biochemical pathways and networks underlying brain  
53 disorders (1). For example, in the developing brain early life insults can affect rapid and long-  
54 lasting changes to gene expression that alter the neuro-immune system and behaviour(2,3).  
55 Microglia, the brain's resident innate immune cells, appear particularly vulnerable to early life  
56 genetic and environmental risk factors for neurodevelopmental, psychiatric and  
57 neurodegenerative disorders (4). As sequencing costs have dropped in recent years (6) and the  
58 ability to isolate microglial populations from the brain has expanded, a number of key microglial  
59 signature gene lists have been identified across disease models (7) and development (8–11). The  
60 ease at which this data can be generated and incorporated into various experiments has led to  
61 gene expression analysis now being utilized not just in hypothesis testing, but also in hypothesis  
62 generation (5). These microglial gene expression differences have been successfully examined  
63 across labs and contexts to identify conserved targets and patterns disrupted across brain  
64 disorders (2,12). However, there is currently no central repository for published microglial gene  
65 lists nor a user friendly, non-programmatic interface that allows biologists to statistically test  
66 their gene list of interest for enrichment of identified microglial gene lists from other studies.  
67  
68 Several enrichment tools currently exist to assist users in interrogating their gene expression  
69 results, such as enrichment of Gene Ontologies using tools such as DAVID (13), Gene set  
70 enrichment analysis (GESA) (14), or pathways KEGG (15,16). However, these interfaces are not

71 specific to individual cell types nor brain disorders and may not accurately reflect microglial-  
72 specific processes or disease states. In comparison, direct gene list comparisons to published  
73 microglia datasets can lead to cell type or cell state specific insights into underlying microglial  
74 mechanisms. However, this requires access to both a curated database of microglial gene lists  
75 and the programmatic skills to implement the analysis and statistics. These obstacles can present  
76 a daunting challenge for the non-programming wet-lab scientist. With the increasing use of  
77 RNAseq and other expression analysis approaches by biologists, there is a growing need for non-  
78 programming based tools that allow for efficient analysis without extensive bioinformatic  
79 experience. This need is particularly great in the area of neuro-immunology which attracts  
80 researchers from a broad set of backgrounds such as neuroscience, immunology, and others.

81

82 Our lab has thus developed MGENrichment (Microglia Enrichment), a customized web  
83 application for performing enrichment testing on a manually curated database of gene lists  
84 pertinent to microglia. A key feature of our application is the user's ability to easily upload a list  
85 of genes of interest, as well as the accessibility of customizing background gene list settings. The  
86 application is intended for use by wet lab scientists who wish to quickly assess the relevance of  
87 their gene expression results, and will be of particular interest to those working in the field of  
88 microglia research, brain disorders, and neuro-immune activation.

89

## 90 **Design and Implementation**

91 The base functionality of the app was built using the R Shiny package  
92 (<https://shiny.rstudio.com/>), and hosted using shinyapps.io by RStudio. MGENrichment allows  
93 the user to upload a list of genes from their experiment in three common gene identifier (ID)

94 formats (Ensembl, Entrez, Mouse gene symbols (MGI)). Depending on which gene ID format is  
95 entered, the database of microglial gene lists (queried from the R biomaRt package (17)) is  
96 filtered for the matching ID type. Users can select between setting the background as all mouse  
97 genes, all the genes in the microglial gene list database, or an optional user-specified list of  
98 background genes. MGENrichment then performs a one-tailed Fisher's exact test using the  
99 GeneOverlap package (18) to compare the overlap between the user's input list and each list in  
100 the microglia database. Statistical significance is calculated relative to the background gene list  
101 and a False Discovery Rate (FDR) correction is then applied across all comparisons. The level of  
102 FDR correction is controlled by the user, allowing for greater flexibility in the statistical  
103 threshold used for significance determination.

104

105 Enrichment results display several key output variables including the odds ratio, p-value, FDR  
106 corrected p-values, and the number and IDs of the overlapping genes for each database list.

107 Information is also provided regarding individual microglial database gene lists including the  
108 group they belong to, a description of the gene list, the species the gene list was collected from,  
109 as well as a literature source for where the gene list originates. These results may be viewed  
110 directly on the web browser, or as a downloaded CSV file.

111

112 The database contains 166 unique microglial gene lists from 40 publications pulled from the  
113 microglial literature (Supplemental Table 1). Gene lists from mouse, rat and human are included,  
114 but all gene IDs were converted to mouse for inclusion in the database. The database of gene lists  
115 was manually curated from previous literature using Ensembl IDs, then queried against biomaRt  
116 to match the additional corresponding MGI symbols and Entrez IDs. It includes a wide

117 assortment of microglial relevant gene lists collected from multiple treatments, disease states and  
118 developmental timepoints in microglia or brain. The default conditions include all genes lists in  
119 the database for analysis, but users may also select subsets of gene lists based on six different list  
120 categories (groups). Group options include Microglia, Microglia Development, Neuropsychiatric  
121 & Neurodevelopmental Disorders human brain, Autism genetics, Autism regulators, and  
122 Inflammation. The user can select the groups to be included in the analysis, allowing for more  
123 targeted analysis to a specific subgrouping within the database.

124

125 To demonstrate the utility of our approach we created two “toy” datasets that examine gene  
126 regulation in ASD. Microglial dysregulation has been observed in ASD postmortem brain  
127 samples in terms of altered cellular morphology and gene expression. Specifically, there have  
128 been four large scale, recent RNAseq studies examining differentially expressed genes from  
129 human ASD postmortem brain compared to matched controls (19–22). All four identified  
130 immune, and specifically microglial, gene expression as altered in ASD brain (19–22). We took  
131 the published gene lists from these papers, divided them into genes with either increased or  
132 decreased expression in ASD and then overlapped the four sets to identify genes consistently  
133 identified in at least 3 out of the 4 datasets. Gene lists were then converted to mouse Ensembl  
134 Identifiers using biomart. Users can access these datasets by clicking their respective buttons on  
135 the application and querying the database to look for gene list enrichments. Alternatively, a  
136 compiled supplemental excel spreadsheet titled (Supplement Table 2) of both toy datasets and  
137 the corresponding MGEnrichment results can be downloaded from the GitHub repository.  
138 Enrichments were calculated using Ensembl gene IDs, with the background set to “All Genes in  
139 the Database”, queried against all gene list groups, and with FDR filtering for  $q < 0.05$ .

140

141 **Results**

142 The MGEnrichment app is setup so that users can easily query the microglia database to analyze  
143 the gene expression profiles of their lists compared to selected lists from the database. The  
144 provided toy ASD increased gene expression dataset (ASD>CTRL DEGs) produces numerous  
145 significant (FDR  $q < 0.05$ ) enrichments with database gene lists. For example, ASD>CTRL DEGs  
146 are significantly enriched for genes with increased in expression in schizophrenia, a relationship  
147 previously identified(22). There were also significant enrichments with gene lists important for  
148 microglial development, gene regulation (*Sall1* and *Mef2c*) and immune activation (PolyI:C and  
149 LPS treatments) (Supplemental Table 2). There were also significant enrichments with gene lists  
150 generated from microglia from germ free mice, supporting a recent growing literature on the role  
151 of the microbiome in ASD (23) and suggesting microbiome disturbances associated with the  
152 disorder may contribute to altered brain microglia. From these enrichments, individual genes of  
153 interest can be identified among the shared genes to identify novel targets for further  
154 investigation. For example, the genes shared by our target toy list (ASD>CTRL DEGs) share  
155 several transcription regulators with the microglial lists from germ-free mice, indicating that  
156 *Hsbp1*, *Tgif1*, and *Cebpb* might be reasonable target genes for further exploration.

157

158 Similarly, using the ASD decreased gene expression dataset (ASD<CTRL DEGs) produces  
159 significant overlaps with lists for other human neuropsychiatric disorders as well as genes  
160 regulated in microglial development (Supplemental Table 2). The developmental list  
161 enrichments all center around lists of differentially expressed genes between embryonic day 18

162 (E18) microglia and postnatal microglia (P4, P14 and P60), suggesting that genes with disruption  
163 in ASD may impact embryonic microglia maturation towards a postnatal transcriptome.

164

165 Together, our two example datasets demonstrate the utility of MGENrichment in exploring  
166 microglial gene regulation in neurodevelopmental disorders. The app can provide both novel  
167 insights into differentially expressed gene lists, as well as identification of microglial target  
168 genes for further examination.

169

### 170 **Availability and Future Directions**

171 The code for the application is also freely available on our GitHub repository, and released under  
172 the GNU General Public License version 3 (GPLv3). By releasing this under an open source  
173 license, we aim to provide transparency as to how our program was designed, as well as invite  
174 collaboration and contributions from others in the field. Documentation for MGENrichment is  
175 provided within a “help” tab of the web application and at

176 <https://github.com/ciernialab/MGENrichmentApp>. All source code is included on the GitHub

177 repository, including the microglia gene list database and instructions for adding in new custom  
178 gene lists to the database.

179

180 MGENrichment allows for a targeted approach to understanding microglial biology by leveraging  
181 known changes in gene expression across different disease and developmental states. As  
182 genomics becomes increasingly intertwined with neuro-immunology and behavioural  
183 neuroscience research, the ability to interpret gene expression results within the broader context  
184 of microglial biology will be a key skillset for many researchers. We have developed



185 MGenrichment to accomplish two main goals: firstly, to disseminate an easy to access database  
186 of curated microglia-relevant gene lists; secondly, to provide a user-friendly interface for non-  
187 programmers to examine their gene lists of interest for impacts on microglial biology.  
188 MGenrichment's hosting on the web through the R Shiny platform allows any user to easily  
189 query their gene list of interest and download their results for further analysis.

190

191 Future directions for the project include expansion to allow for direct comparisons of human  
192 gene IDs. We can also expand to include additional types of data visualization, such as dot plots  
193 to better visualize the level of gene enrichment and network visualizations to support more  
194 systems-based analyses. It is our hope that this app will act as a useful tool to bridge the gap  
195 between wet and dry-lab scientists in microglial research, and to help traditional behavioural  
196 neuroscientists and immunologists to interpret changes in microglial gene regulation.

197

198

### 199 **Acknowledgements**

200 We would like to thank members of the Ciernia, Tropini and Osborne labs at UBC for helpful  
201 feedback on this project.

202

### 203 **Author Contributions**

204 A.C. conceived of the project, collected the microglia gene list database and contributed to code.

205 J.J. wrote the majority of the code and implemented the R Shiny application. Both authors wrote

206 and edited the manuscript.

207

## 208 **Funding**

209 This work was supported by the Canadian Institutes for Health Research [CRC-RS 950-232402  
210 to AC]; Natural Sciences and Engineering Research Council of Canada [RGPIN-2019-04450,  
211 DGEER-2019-00069 to AC]; Canada Foundation for Innovation / John R. Evans Leaders Fund –  
212 Partnerships [CFI 38190 to AC]; SickKids Foundation [NI20-1004 to AC]; and Brain and  
213 Behavior Research Foundation [Young Investigator Award 26784 to AC]. This work was  
214 supported by resources made available through the NeuroImaging and NeuroComputation Centre  
215 at the Djavad Mowafaghian Centre for Brain Health (RRID: SCR\_019086).

216

## 217 **Figure legends**

218 Figure 1. Model of MGENrichment. Users can upload their gene lists of interest either through a  
219 CSV file or through entry into the GUI. The input dataset is compared against the database of  
220 microglia gene lists to determine enrichment. The GeneOverlap package is used to calculate a one-  
221 tailed Fisher's Exact Test for enrichment in each gene list, and FDR correct p-values are then  
222 calculated across all comparisons. The enriched gene results and corresponding statistical  
223 significance are then viewable via the GUI, or exportable via CSV. ASD = Autism Spectrum  
224 Disorder.

225 Figure 2. Preview of MGENrichment, as previewed on a Web Browser. The left panel includes  
226 user-input and possible modifications to results, while the table on the right outputs the user  
227 query results for each gene list.

228

## 229 **References**

- 230 1. Geschwind DH, Konopka G. Neuroscience in the era of functional genomics and systems  
231 biology. *Nature*. 2009.
- 232 2. Vogel Ciernia A, Careaga M, LaSalle JM, Ashwood P. Microglia from offspring of dams  
233 with allergic asthma exhibit epigenomic alterations in genes dysregulated in autism. *Glia*  
234 [Internet]. 2018 Nov 14 [cited 2017 Nov 30];66(3):505–21. Available from:  
235 <http://doi.wiley.com/10.1002/glia.23261>
- 236 3. Schwartz JJ, Careaga M, Coburn MA, Rose DR, Hughes HK, Ashwood P. Behavioral  
237 impact of maternal allergic-asthma in two genetically distinct mouse strains. *Brain Behav*  
238 *Immun* [Internet]. 2017 [cited 2017 Jan 28];36:99–107. Available from:  
239 <http://www.ncbi.nlm.nih.gov/pubmed/27622677>
- 240 4. Thion MS, Garel S. On place and time: microglia in embryonic and perinatal brain  
241 development [Internet]. Vol. 47, *Current Opinion in Neurobiology*. 2017 [cited 2018 Mar  
242 22]. p. 121–30. Available from: <http://www.ncbi.nlm.nih.gov/pubmed/29080445>
- 243 5. Holtman IR, Raj DD, Miller JA, Schaafsma W, Yin Z, Brouwer N, et al. Induction of a  
244 common microglia gene expression signature by aging and neurodegenerative conditions:  
245 a co-expression meta-analysis. *Acta Neuropathol Commun* [Internet]. 2015 [cited 2017  
246 Jan 24];3(1):1–18. Available from: <http://www.actaneurocomms.org/content/3/1/31>
- 247 6. Wetterstrand K. DNA Sequencing Costs: Data from the NHGRI Genome Sequencing  
248 Program (GSP) [Internet]. *genome.gov*. 2021. Available from:  
249 [www.genome.gov/sequencingcostsdata](http://www.genome.gov/sequencingcostsdata).
- 250 7. Keren-Shaul H, Spinrad A, Weiner A, Matcovitch-Natan O, Dvir-Szternfeld R, Ulland  
251 TK, et al. A Unique Microglia Type Associated with Restricting Development of  
252 Alzheimer’s Disease. *Cell* [Internet]. 2017;169(7):1276-1290.e17. Available from:

- 253 <http://dx.doi.org/10.1016/j.cell.2017.05.018>
- 254 8. Matcovitch-Natan O, Winter DR, Giladi A, Vargas Aguilar S, Spinrad A, Sarrazin S, et al.  
255 Microglia development follows a stepwise program to regulate brain homeostasis.  
256 Science. 2016;353(6301):aad8670.
- 257 9. Thion MS, Low D, Silvin A, Chen J, Grisel P, Schulte-Schrepping J, et al. Microbiome  
258 Influences Prenatal and Adult Microglia in a Sex-Specific Manner. Cell [Internet].  
259 2018;172(3):500-516.e16. Available from: <https://doi.org/10.1016/j.cell.2017.11.042>
- 260 10. Hammond TR, Dufort C, Dissing-Olesen L, Giera S, Young A, Wysoker A, et al. Single-  
261 Cell RNA Sequencing of Microglia throughout the Mouse Lifespan and in the Injured  
262 Brain Reveals Complex Cell-State Changes. Immunity. 2019;
- 263 11. Li Q, Cheng Z, Zhou L, Darmanis S, Neff NF, Okamoto J, et al. Developmental  
264 Heterogeneity of Microglia and Brain Myeloid Cells Revealed by Deep Single-Cell RNA  
265 Sequencing. Neuron. 2019;
- 266 12. Vogel Ciernia A, Laufer BI, Hwang H, Dunaway KW, Mordaunt CE, Coulson RL, et al.  
267 Epigenomic Convergence of Neural-Immune Risk Factors in Neurodevelopmental  
268 Disorder Cortex. Cereb Cortex [Internet]. 2019 Jun 26 [cited 2019 Jul 8];bhz115.  
269 Available from: <http://www.ncbi.nlm.nih.gov/pubmed/31240313>
- 270 13. Jr GD, Sherman BT, Hosack DA, Yang J. DAVID: Database for Annotation,  
271 Visualization, and Integrated Discovery. 2003;4(5):P3.
- 272 14. Subramanian A, Tamayo P, Mootha VK, Mukherjee S, Ebert BL. Gene set enrichment  
273 analysis: a knowledge-based approach for interpreting genome-wide expression profiles.  
274 2005 Oct 25;102(43):15545–50.
- 275 15. Kanehisa M, Goto S, Sato Y, Furumichi M, Tanabe M. KEGG for integration and

- 276 interpretation of large-scale molecular data sets. 2012 Jan;40(Database issue):D109-14.
- 277 16. Ogata H, Goto S, Sato K, Fujibuchi W, Bono H, Kanehisa M. KEGG: Kyoto  
278 Encyclopedia of Genes and Genomes. 1999 Jan 1;27(1):29–34.
- 279 17. Durinck S, Spellman PT, Birney E, Huber W. Mapping identifiers for the integration of  
280 genomic datasets with the R/ Bioconductor package biomaRt. Nat Protoc. 2009;
- 281 18. Shen L. GeneOverlap: An R package to test and visualize gene overlaps [Internet]. Mount  
282 Sinai; 2013 [cited 2017 Jan 25]. Available from: [http://shenlab-sinai.github.io/shenlab-](http://shenlab-sinai.github.io/shenlab-sinai/)  
283 [sinai/](http://shenlab-sinai/)
- 284 19. Gupta S, Ellis SE, Ashar FN, Moes A, Bader JS, Zhan J, et al. Transcriptome analysis  
285 reveals dysregulation of innate immune response genes and neuronal activity-dependent  
286 genes in autism. Nat Commun [Internet]. 2014;5:5748. Available from:  
287 <http://www.nature.com/doi/10.1038/ncomms6748>
- 288 20. Parikshak NN, Swarup V, Belgard TG, Irimia M, Ramaswami G, Gandal MJ, et al.  
289 Genome-wide changes in lncRNA, splicing, and regional gene expression patterns in  
290 autism. Nature [Internet]. 2016 Dec 5 [cited 2017 Jul 18];540(7633):423–7. Available  
291 from:  
292 <https://www.ncbi.nlm.nih.gov/pubmed/27919067> [http://www.nature.com/nature/jour-](http://www.nature.com/nature/journal/vaop/ncurrent/pdf/nature20612.pdf)  
293 [nal/vaop/ncurrent/pdf/nature20612.pdf](http://www.nature.com/nature/journal/vaop/ncurrent/pdf/nature20612.pdf)
- 294 21. Gandal MJ, Zhang P, Hadjimichael E, Walker RL, Chen C, Liu S, et al. Transcriptome-  
295 wide isoform-level dysregulation in ASD, schizophrenia, and bipolar disorder. Science  
296 (80- ) [Internet]. 2018 Dec 14 [cited 2018 Dec 18];362(6420):eaat8127. Available from:  
297 <http://www.ncbi.nlm.nih.gov/pubmed/30545856>
- 298 22. Gandal MJ, Haney J, Parikshak N, Leppa V, Horvath S, Geschwind DH. Shared

299 molecular neuropathology across major psychiatric disorders parallels polygenic overlap.  
300 Science (80- ) [Internet]. 2018;693(February):693–7. Available from:  
301 <http://biorxiv.org/content/early/2016/02/18/040022.abstract>  
302 23. Pulikkan J, Mazumder A, Grace T. Role of the Gut Microbiome in Autism Spectrum  
303 Disorders. In: Advances in Experimental Medicine and Biology [Internet]. Springer New  
304 York LLC; 2019 [cited 2021 May 25]. p. 253–69. Available from:  
305 <https://pubmed.ncbi.nlm.nih.gov/30747427/>

306

307

## 308 **Supplementary Table Captions**

### 309 **Supplemental Table 2: MG Database**

310 Sheet 1: MG Database. Includes an entry for each gene list in the curated database, description of  
311 the gene list, source/citation, group assignment, species of the original study, tissue,  
312 abbreviated name and the number of Ensembl mouse IDs within that list.

### 313 **Supplemental Table 2: Toy Dataset**

314 Sheet 1: ASD>CTRL\_DEGs\_Dataset. Includes the input dataset containing the mouse Ensembl  
315 IDs for genes identified across 3 out of 4 human brain RNA-seq studies comparing brain  
316 samples from ASD and Controls. DEGs show higher expression in ASD compared to  
317 Control samples.

318 Sheet 2: ASD>CTRL\_DEGs\_Results. FDR filtered ( $q < 0.05$ ) enrichment results are shown for  
319 all significant enrichments between ASD>CTRL DEGs and gene lists in the  
320 MGENrichment database

321 Sheet 3: ASD<CTRL\_DEGs\_Dataset. Includes the input dataset containing the mouse Ensembl  
322 IDs for genes identified across 3 out of 4 human brain RNA-seq studies comparing brain  
323 samples from ASD and Controls. DEGs show lower expression in ASD compared to  
324 Control samples.

325 Sheet 4: ASD<CTRL\_DEGs\_Results. FDR filtered ( $q < 0.05$ ) enrichment results are shown for  
326 all significant enrichments between ASD<CTRL DEGs and gene lists in the  
327 MGENrichment database.

328

329

## Front-End

## Back-End

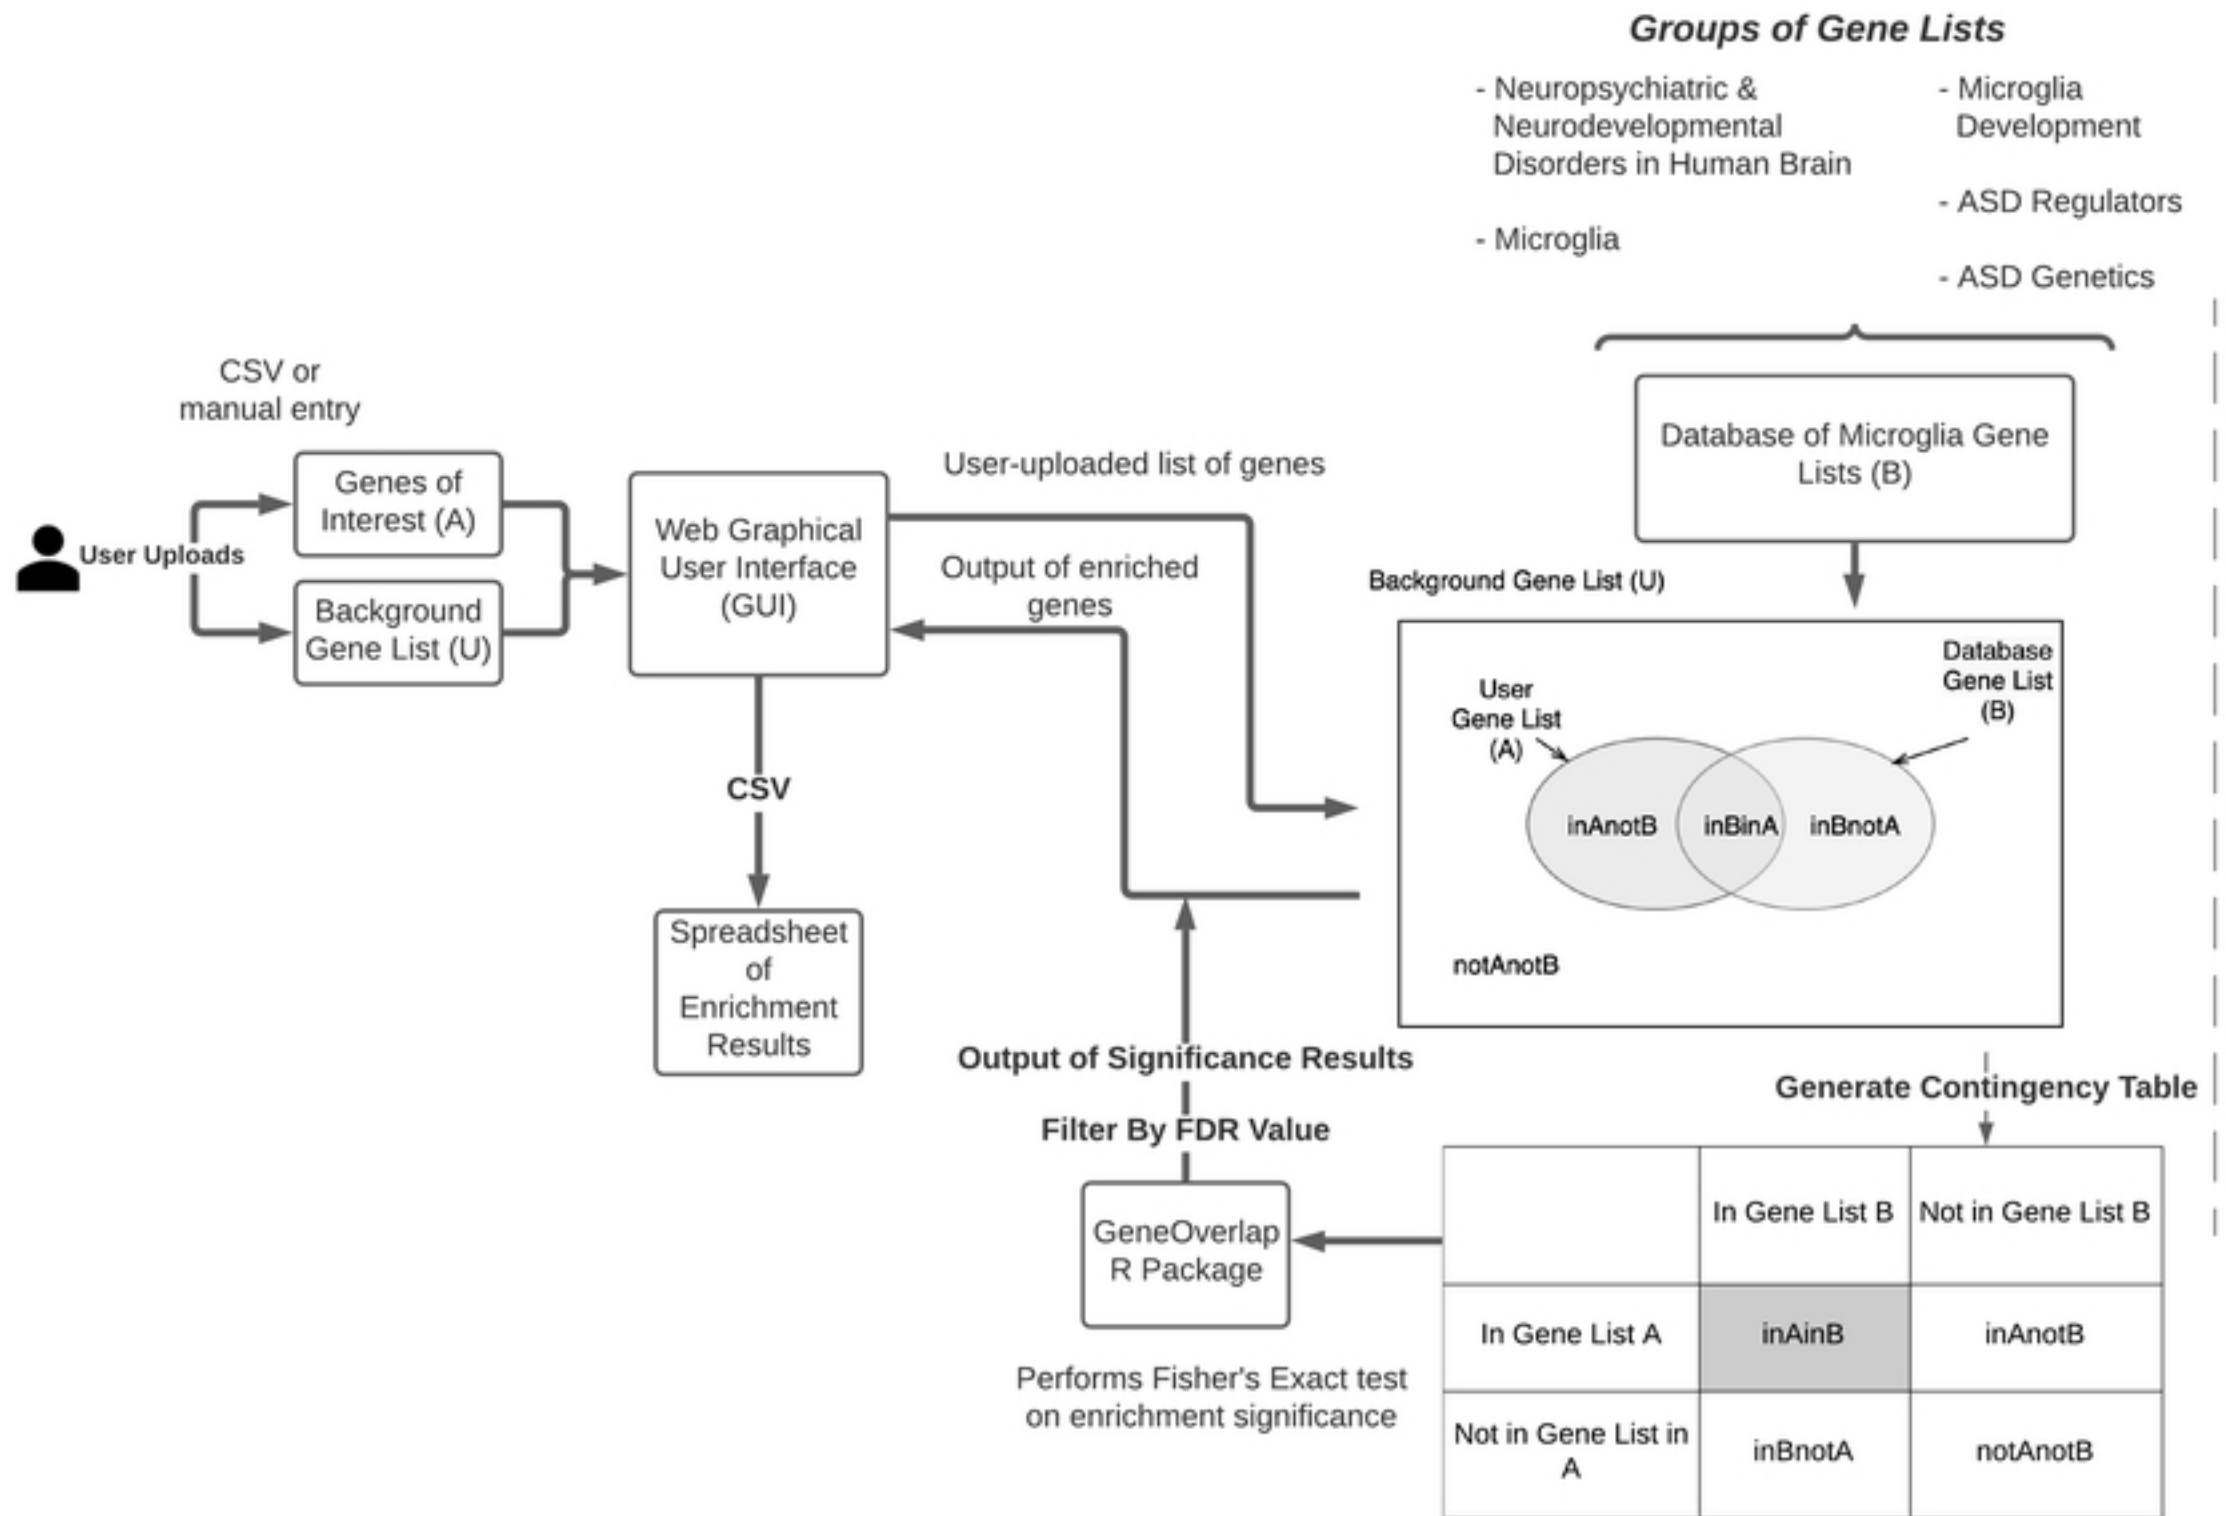

Figure 1



Input your genes of interest here (must all be the same gene ID format)

ENSMUSG00000000001,  
ENSMUSG000000000149,

or upload your gene list here (or try out our sample datasets below)

Browse... No file selected

Click here for Sample Datasets from Human ASD Brain:

ASD>Ctrl DEGs

ASD>Ctrl DEGs

Which gene ID are you using?

- Ensembl  
 Entrez  
 MGI Symbol

Which gene list groups are you interested in?

- Neuropsychiatric & Neurodevelopmental Disorders human brain  
 Microglia Development  Microglia  ASD regulators  
 Inflammation  ASD genetics

Set the background query:

- All mm10 Genes  
 All Genes in the Database  
 Custom

Disable Intersection Gene IDs?

- Intersection IDs  Ensembl  MGI Symbol  Entrez

Change Minimum FDR-value (1.0 means no filtering):

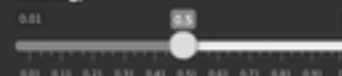

Query Genes

Download Results

Table Help

Show 10 entries

Search:

|   | listname                    | pvalue   | OR               | notAnotB | inAnotB | inBnotA | inBinA | Intersection_IDs                                                                                                                                                                                                                                                                                                                                                     | Intersection_ensembl                                                                                                                                                                                                                                                                                                                                                | Intersection_mgi_symbol                                                   | Intersection_entrez                                                    | FD    |
|---|-----------------------------|----------|------------------|----------|---------|---------|--------|----------------------------------------------------------------------------------------------------------------------------------------------------------------------------------------------------------------------------------------------------------------------------------------------------------------------------------------------------------------------|---------------------------------------------------------------------------------------------------------------------------------------------------------------------------------------------------------------------------------------------------------------------------------------------------------------------------------------------------------------------|---------------------------------------------------------------------------|------------------------------------------------------------------------|-------|
| 1 | adult MG cluster 2          | 0.034912 | 2.10092650446466 | 16899    | 189     | 383     | 9      | ENSMUSG000000006705,<br>ENSMUSG000000009291,<br>ENSMUSG000000014361,<br>ENSMUSG000000016239,<br>ENSMUSG000000020593,<br>ENSMUSG000000032609,<br>ENSMUSG000000036478,<br>ENSMUSG000000036995,<br>ENSMUSG000000042613                                                                                                                                                  | ENSMUSG000000014361,<br>ENSMUSG000000036995,<br>ENSMUSG000000020593,<br>ENSMUSG000000016239,<br>ENSMUSG000000042613,<br>ENSMUSG00000009291,<br>ENSMUSG00000006705,<br>ENSMUSG000000036478,<br>ENSMUSG000000032609                                                                                                                                                   | Mertk, Asap3, Lpin1, Lonrf3,<br>Pbxip1, Pttg1ip, Pknox1,<br>Btg1, Klhdc8b | 17289, 230837, 14245,<br>74365, 229534, 108705,<br>18771, 12226, 78267 | 0.105 |
| 2 | Apoe KO vs WT MG            | 0.12781  | 7.96719515927955 | 17271    | 197     | 11      | 1      | ENSMUSG000000002985                                                                                                                                                                                                                                                                                                                                                  | ENSMUSG000000002985                                                                                                                                                                                                                                                                                                                                                 | Apoe                                                                      | 11816                                                                  | 0.316 |
| 3 | Apoe KO vs WT phagocytic MG | 0.037222 | 7.04022492645674 | 17257    | 196     | 25      | 2      | ENSMUSG000000002985,<br>ENSMUSG000000025666                                                                                                                                                                                                                                                                                                                          | ENSMUSG000000025666,<br>ENSMUSG000000002985                                                                                                                                                                                                                                                                                                                         | Tmem47, Apoe                                                              | 192216, 11816                                                          | 0.110 |
|   |                             |          |                  |          |         |         |        | ENSMUSG000000000001,<br>ENSMUSG000000000149,<br>ENSMUSG000000000247,<br>ENSMUSG000000000827,<br>ENSMUSG000000002227,<br>ENSMUSG000000002233,<br>ENSMUSG000000002475,<br>ENSMUSG000000002985,<br>ENSMUSG000000003849,<br>ENSMUSG000000004040,<br>ENSMUSG000000004951,<br>ENSMUSG000000005054,<br>ENSMUSG000000005103,<br>ENSMUSG000000005413,<br>ENSMUSG000000006019, | ENSMUSG000000028527,<br>ENSMUSG000000034353,<br>ENSMUSG00000000149,<br>ENSMUSG000000020326,<br>ENSMUSG000000030339,<br>ENSMUSG000000060798,<br>ENSMUSG000000002475,<br>ENSMUSG000000004040,<br>ENSMUSG000000021127,<br>ENSMUSG000000036995,<br>ENSMUSG000000030341,<br>ENSMUSG000000040212,<br>ENSMUSG000000026185,<br>ENSMUSG000000016528,<br>ENSMUSG000000026463, |                                                                           |                                                                        |       |

Screenshot

Figure 2
